# Supplementary material
Source: publisher figshare collection journal article supplement (https://sage.figshare.com/ndownloader/files/16798769)
Supplement: Supplementary file 1 [file 16798769]

## Supplemental material

Figure - averages diameters of inhibition zones in diffusion test agar using aqueous and ethanolic extracts from *Mangifera indica* L. leaves

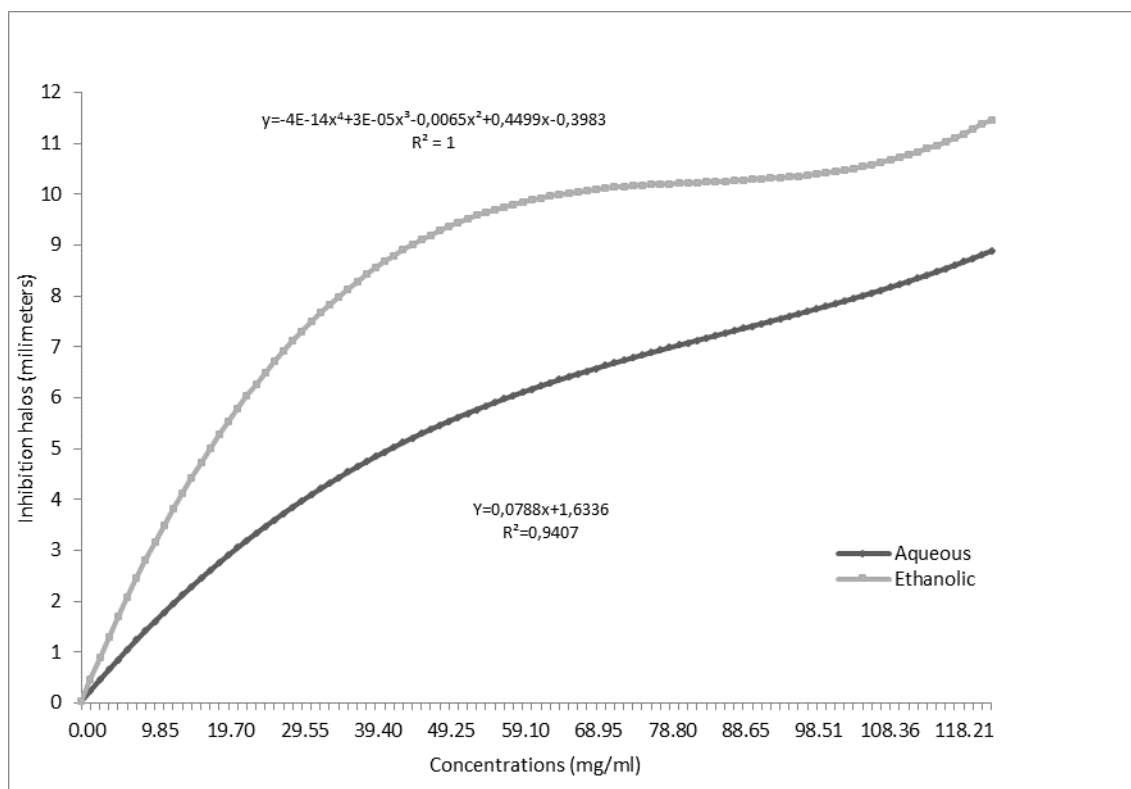

Source: Prepared by the authors, 2017.
